# Supplementary material for: Tissue Microarrays to Visualize Influenza D Attachment to Host Receptors in the Respiratory Tract of Farm Animals
Source: MDPI journal article supplement (doi:10.3390/v13040586), 2021-03-31
Supplement: s1 [file s1]

**Table S1:** Composition and arrangement of the cattle (*Bos taurus domesticus*) tissue microarray.

|          | <b>A – Cattle 1</b><br>3190705039 | <b>B – Cattle 2</b><br>3190124023 | <b>C – Cattle 3</b><br>3190508048 | <b>D – Cattle 4</b><br>3190703001 | <b>E – Cattle 5</b><br>3190703030 | <b>F</b> |
|----------|-----------------------------------|-----------------------------------|-----------------------------------|-----------------------------------|-----------------------------------|----------|
| <b>1</b> | Nasal epithelium                  | x        |
| <b>2</b> | Pharynx                           | x                                 | Pharynx                           | Pharynx                           | Pharynx                           | x        |
| <b>3</b> | Upper trachea                     | x        |
| <b>4</b> | Lower trachea                     | x        |
| <b>5</b> | Primary Bronchus                  | x                                 | Primary Bronchus                  | Primary Bronchus                  | Lung                              | x        |
| <b>6</b> | Lung                              | Lung                              | Lung                              | Lung                              | Primary Bronchus                  | x        |

**Table S2:** Composition and arrangement of the domestic pig (*Sus scrofa domesticus*) tissue microarray.

|          | <b>A – Dom. Pig 1</b><br>3190502038 | <b>B – Dom. Pig 2</b><br>3190509021 | <b>C – Dom. Pig 3</b><br>3191010028 | <b>D – Dom. Pig 4</b><br>3191010025 | <b>E – Dom. Pig 5</b><br>3191010026 | <b>F – Dom. Pig 5</b><br>3191010027 |
|----------|-------------------------------------|-------------------------------------|-------------------------------------|-------------------------------------|-------------------------------------|-------------------------------------|
| <b>1</b> | Nasal epithelium                    |
| <b>2</b> | Pharynx                             | Pharynx                             | Pharynx                             | x                                   | x                                   | Pharynx                             |
| <b>3</b> | Upper trachea                       |
| <b>4</b> | Lower trachea                       |
| <b>5</b> | Primary Bronchus                    | Lung                                |
| <b>6</b> | Lung                                | Lung                                | Lung                                | Lung                                | x                                   | x                                   |

**Table S3:** Composition and arrangement of the sheep (*Ovis orientalis aries*) tissue microarray.

|          | <b>A</b> | <b>B – Sheep 1</b><br>3190503010 | <b>C</b> | <b>D – Sheep 2</b><br>3190612024 | <b>E</b> | <b>F</b> |
|----------|----------|----------------------------------|----------|----------------------------------|----------|----------|
| <b>1</b> | x        | Nasal epithelium                 | x        | Nasal epithelium                 | x        | x        |
| <b>2</b> | x        | Pharynx                          | x        | Pharynx                          | x        | x        |
| <b>3</b> | x        | Upper trachea                    | x        | Upper trachea                    | x        | x        |
| <b>4</b> | x        | Lower trachea                    | x        | Lower trachea                    | x        | x        |
| <b>5</b> | x        | Prim. Bronchus                   | x        | Prim. Bronchus                   | x        | x        |
| <b>6</b> | x        | Lung                             | x        | Lung                             | x        | x        |

**Table S4:** Composition and arrangement of the goat (*Capra aegagrus hircus*) tissue microarray.

|          | <b>A</b> | <b>B – Goat 1</b><br>3181003029 | <b>C – Goat 2</b><br>3191024026 | <b>D – Goat 3</b><br>60899/2018 | <b>E – Goat 4</b><br>1104026 | <b>F</b> |
|----------|----------|---------------------------------|---------------------------------|---------------------------------|------------------------------|----------|
| <b>1</b> | x        | Nasal epithelium                | Nasal epithelium                | Nasal epithelium                | Nasal epithelium             | x        |
| <b>2</b> | x        | Pharynx                         | Pharynx                         | Pharynx                         | Pharynx                      | x        |
| <b>3</b> | x        | Upper trachea                   | Upper trachea                   | Upper trachea                   | Upper trachea                | x        |
| <b>4</b> | x        | Lower trachea                   | Lower trachea                   | Lower trachea                   | Lower trachea                | x        |
| <b>5</b> | x        | Prim. Bronchus                  | Prim. Bronchus                  | Prim. Bronchus                  | Lung                         | x        |
| <b>6</b> | x        | Lung                            | Lung                            | Lung                            | Prim. Bronchus               | x        |

**Table S5:** Composition and arrangement of the horse (*Equus ferus caballus*) tissue microarray.

|          | <b>A – Horse 1</b><br>3191126005 | <b>B – Horse 2</b><br>3190128026 | <b>C – Horse 3</b><br>320010029 | <b>D – Horse 4</b><br>3200113001 | <b>E – Horse 5</b><br>3160226033 | <b>F</b> |
|----------|----------------------------------|----------------------------------|---------------------------------|----------------------------------|----------------------------------|----------|
| <b>1</b> | Nasal epithelium                 | Nasal epithelium                 | Nasal epithelium                | Nasal epithelium                 | Nasal epithelium                 | x        |
| <b>2</b> | Pharynx                          | Pharynx                          | x                               | Pharynx                          | Pharynx                          | x        |
| <b>3</b> | Upper trachea                    | Upper trachea                    | Upper trachea                   | Upper trachea                    | Upper trachea                    | x        |
| <b>4</b> | Lower trachea                    | Lower trachea                    | Lower trachea                   | x                                | Upper trachea                    | x        |
| <b>5</b> | Primary<br>Bronchus              | Primary Bronchus                 | Primary Bronchus                | x                                | Prim. Bronchus                   | x        |
| <b>6</b> | Lung                             | Lung                             | Lung                            | Lung                             | x                                | x        |

The number under each animal indicates the general laboratory information management system (GLIMS) number under which the animal is registered at Faculty of Veterinary Medicine, Utrecht University. X's mark locations where no tissue is located.

All arrays were checked using plant lectins MAL and SNA for presence of sialic acid receptors as quality control. D/OK HEF S57A and D/660 HEF S57A binding controls to acetylated-sialic acids were confirmed via neuraminidase treatment to confirm sialic acid dependence and via saponification for acetylated sialic acid dependence. All controls and technical repeats were performed 3 times per tissue microarray. No anomalies or variances were detected in any of the controls or repeats.
