# Supplementary material for: Tissue Microarrays to Visualize Influenza D Attachment to Host Receptors in the Respiratory Tract of Farm Animals
Source: MDPI journal article supplement (doi:10.3390/v13040586), 2021-03-31
Supplement: s1 [file s1]

Supplementary Figure S1

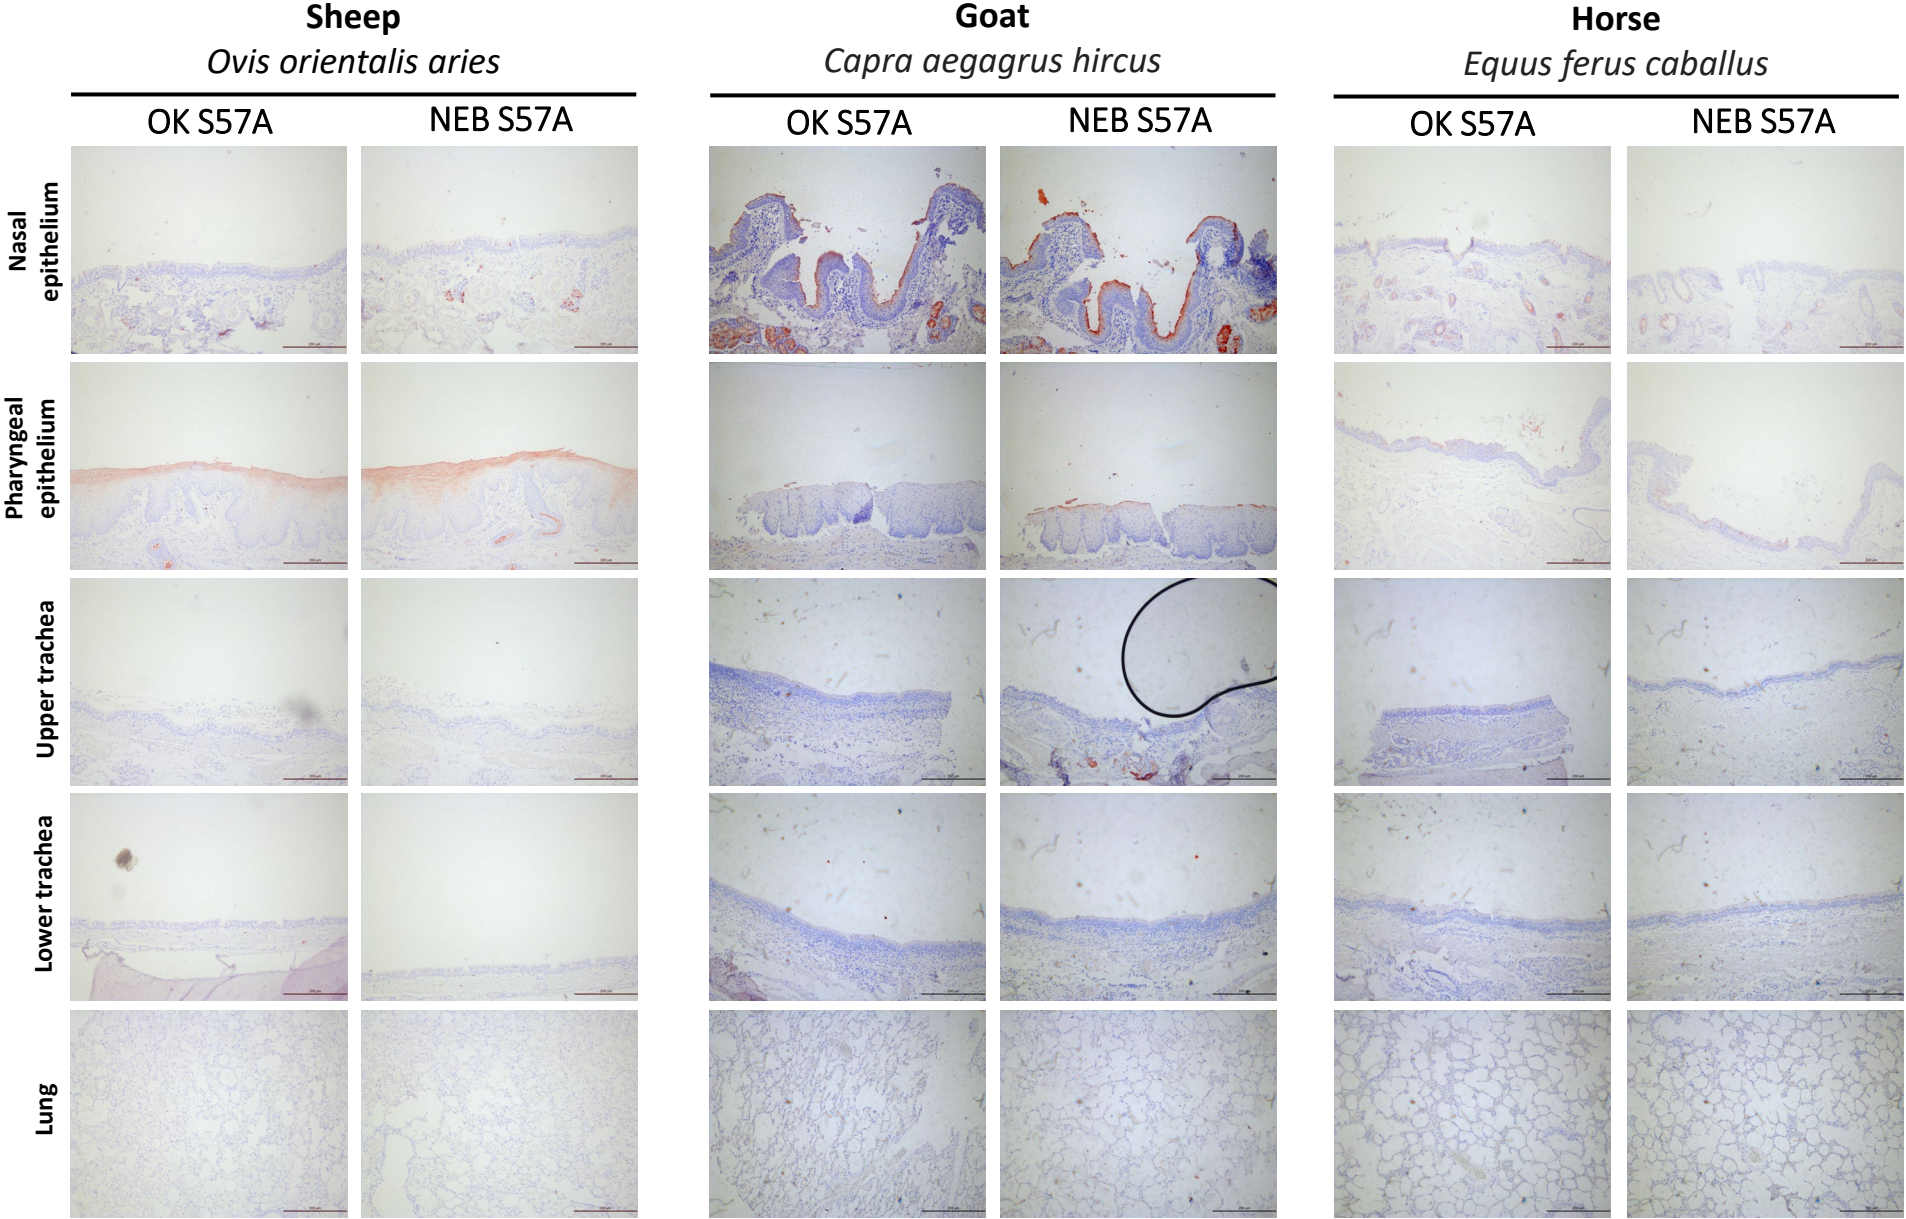

**Figure S1.** Protein histochemical staining of tissue micro-arrays containing sheep (2 on array), goat (4 on array), and horse (5 on array) respiratory tissues with D/OK and D/660 HEF S57A proteins at 50 µg/ml on the upper and lower respiratory tract.
